# Supplementary material for: Germline functional variants contribute to somatic mutation and outcomes in neuroblastoma
Source: PubMed Central journal article supplement — Nat Commun. 2024 Sep 27;15:8360. doi: 10.1038/s41467-024-52128-5 (PMC11437149; doi:10.1038/s41467-024-52128-5), 2024-09-27
Supplement: 41467_2024_52128_MOESM1_ESM.pdf [file 41467_2024_52128_MOESM1_ESM.pdf]

## Supplementary information for

### Germline Functional Variants Contribute to Somatic Mutation and Outcomes in Neuroblastoma

Eun Seop Seo<sup>#1,2</sup>, Ji Won Lee<sup>#1</sup>, Jinyeong Lim<sup>3</sup>, Sunghwan Shin<sup>4</sup>, Hee Won Cho<sup>1</sup>, Hee Young Ju<sup>1</sup>, Keon Hee Yoo<sup>1</sup>, Ki Woong Sung<sup>\*1</sup> and Woong-Yang Park<sup>\*2,3,5</sup>

<sup>1</sup>Department of Pediatrics, Samsung Medical Center, Sungkyunkwan University School of Medicine, Seoul, Korea

<sup>2</sup>Department of Digital Health, Samsung Advanced Institute for Health Science and Technology, Sungkyunkwan University, Seoul, Korea

<sup>3</sup>Samsung Genome Institute, Samsung Medical Center, Seoul, Korea

<sup>4</sup>Department of Laboratory Medicine, Inje University Ilsan Paik Hospital, Goyang, Korea <sup>5</sup>Department of Molecular Cell Biology, Sungkyunkwan University School of Medicine, Suwon, Korea

<sup>#</sup>Eun Seop Seo and Ji Won Lee contributed equally to this work.

**Correspondence Authors:** Woong-Yang Park, Samsung Genome Institute, Samsung Medical Center, 81 Irwon-ro, Gangnam-gu, Seoul 06351, Republic of Korea, E-mail: [woongyang.park@samsung.com](mailto:woongyang.park@samsung.com) and Ki Woong Sung, Department of Pediatrics, Samsung Medical Center, Sungkyunkwan University School of Medicine, 81 Irwon-ro, Gangnam-gu, Seoul 06351, Republic of Korea, E-mail: [kwsped@skku.edu](mailto:kwsped@skku.edu)

This file includes

Supplementary Figures 1 to 8

Supplementary Tables 1 to 2

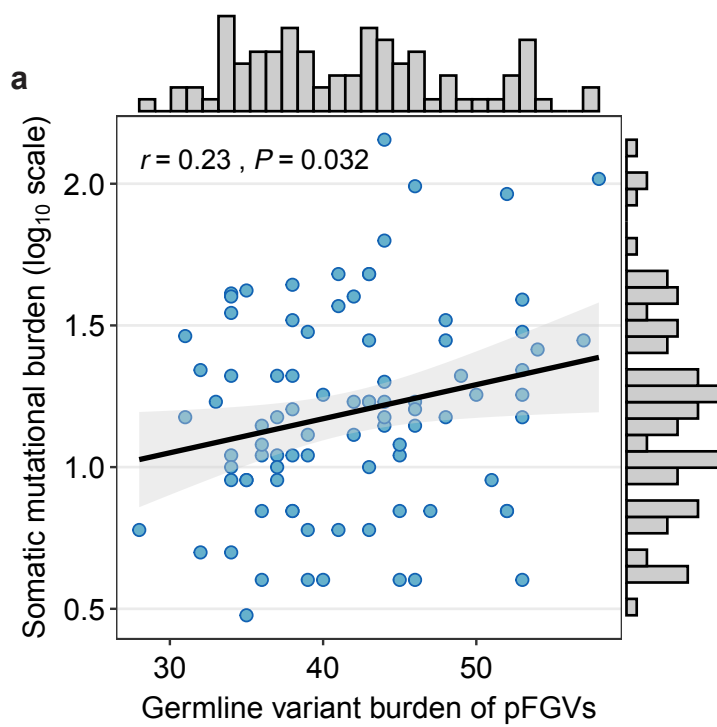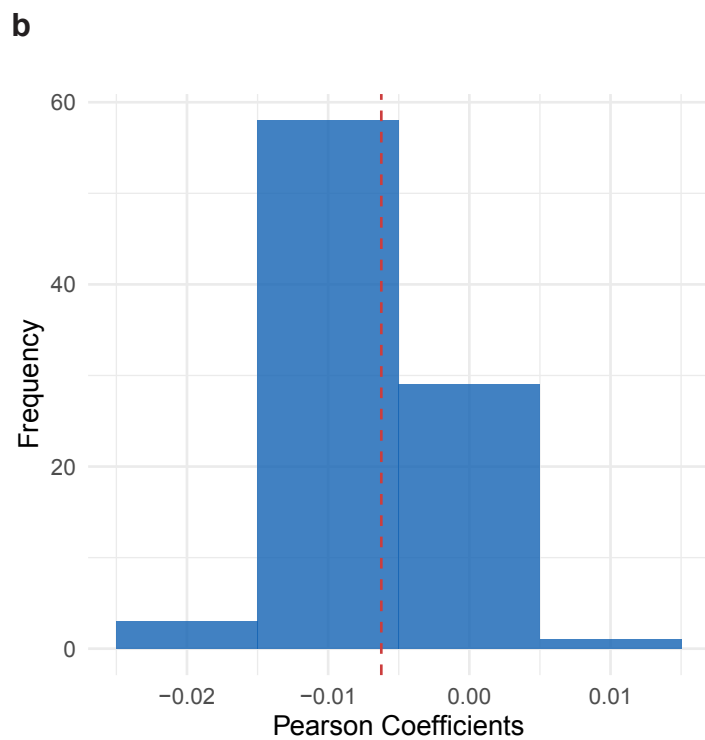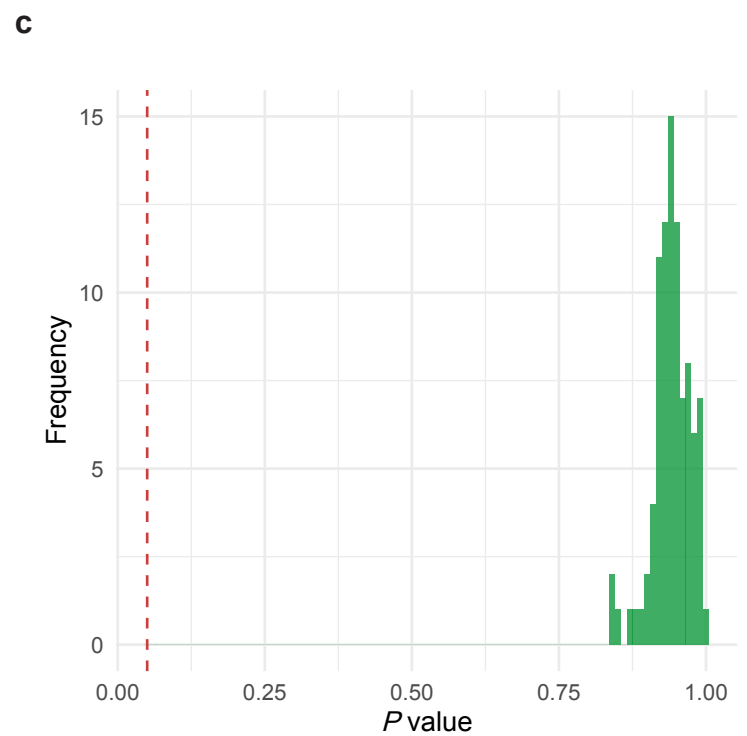

**Supplementary Fig. 1 Correlation between germline variant burden and somatic mutational burden.**

**a**, Correlation in patients without pFGVs in DDR genes in SMC cohort. The  $r$  represents Pearson's correlation coefficient and the black line represents the fitted values from linear regressions, with 95% confidence intervals in grey. **b**, Histogram of the two-sided Pearson coefficients from down-sampling analysis in synonymous germline variants. The red dashed line indicates mean of coefficient. **c**, Histogram of  $P$  value from down-sampling analysis in synonymous germline variants. The red dashed line indicates a  $P$  value of 0.05. Source data are provided as a Source Data file.

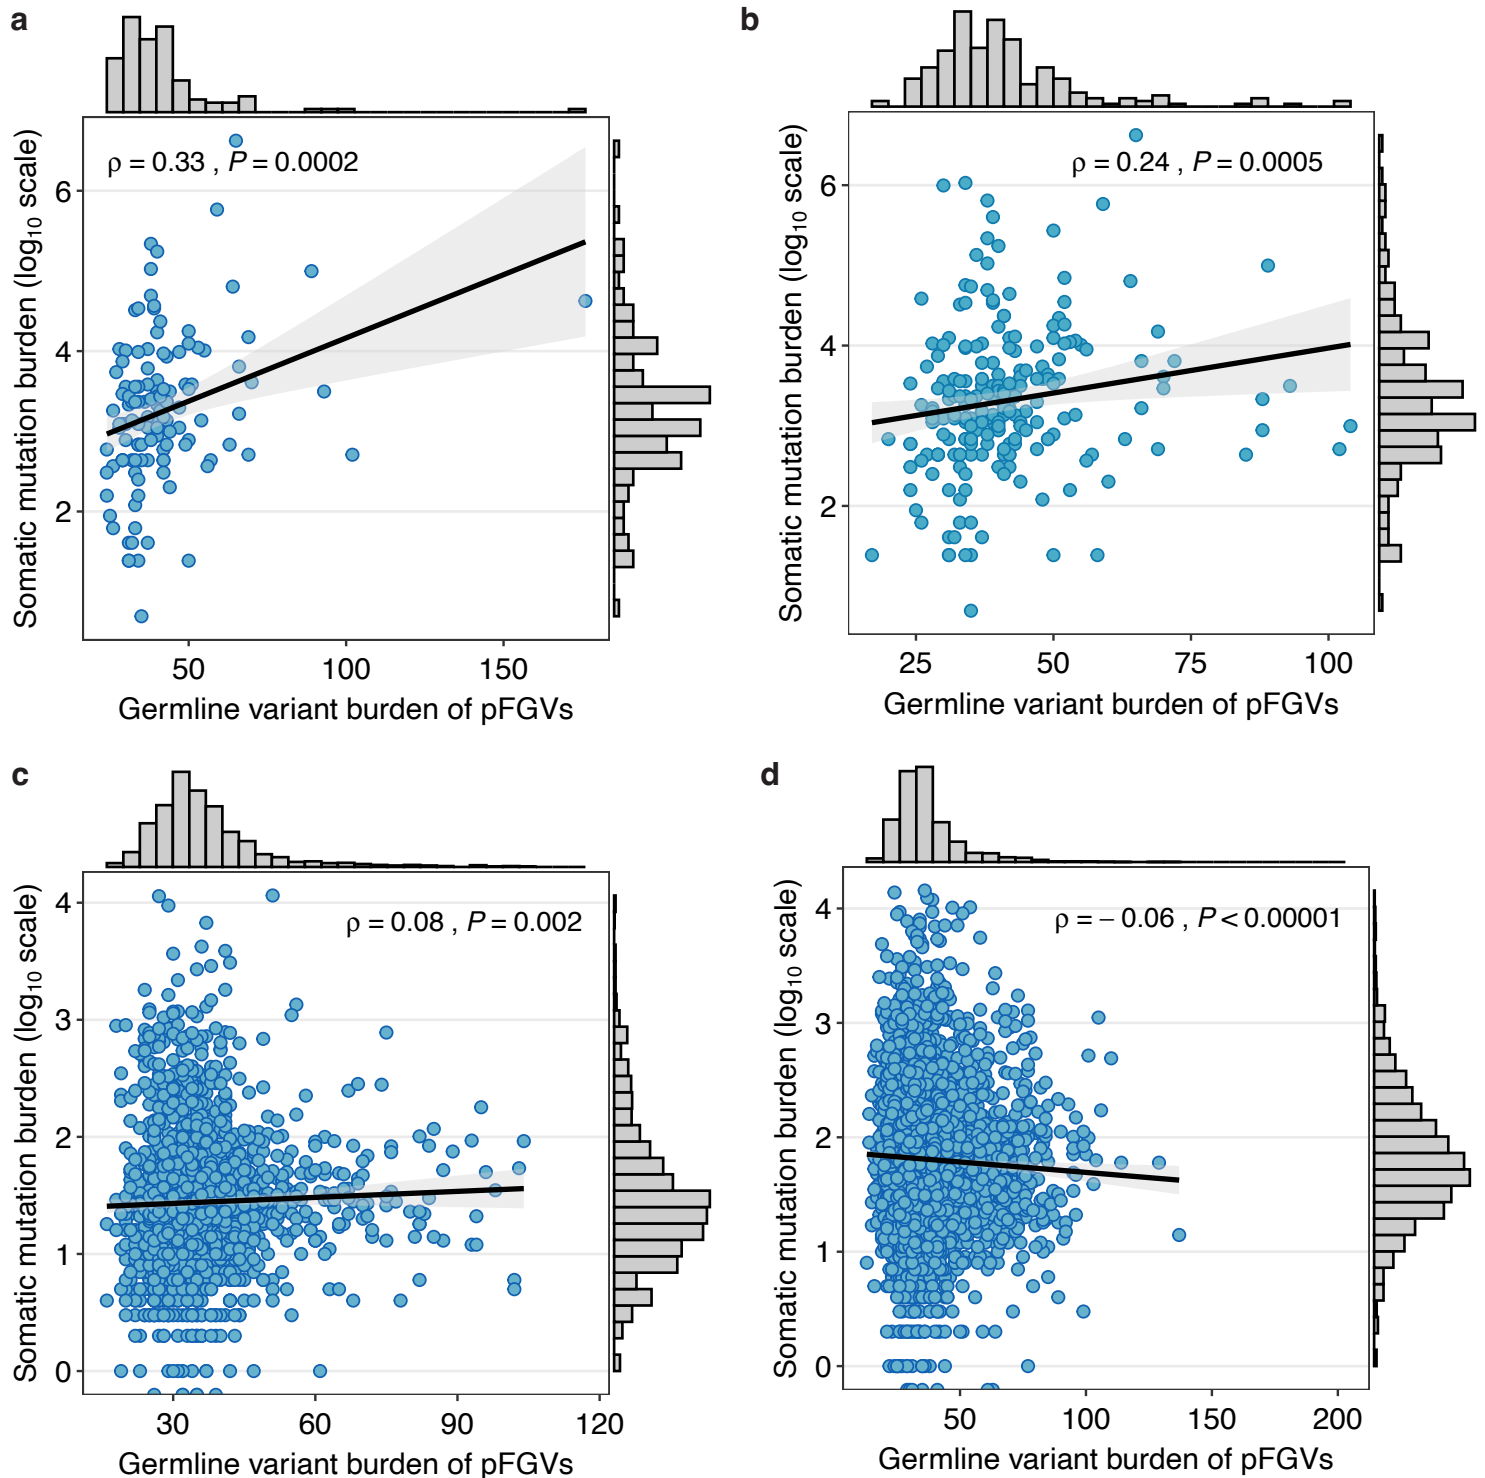

**Supplementary Fig. 2 Correlation between germline variant burden and somatic mutational burden in TARGET and TCGA cohort (subgroup analysis).**

**a**, Correlation in patients without pFGVs in DDR genes (TARGET). **b**, Correlation in patients after excluding outliers determined by a Z-score threshold of 3 (TARGET). **c**, Correlation in early-onset cancer (TCGA). **d**, Correlation in late-onset cancer (TCGA). For all the scatter plots, the  $\rho$  represents Spearman's correlation coefficient and the black line represents the fitted values from linear regressions, with 95% confidence intervals in grey. Statistical analysis was performed using two-sided tests without correction for multiple comparisons. Source data are provided as a Source Data file.

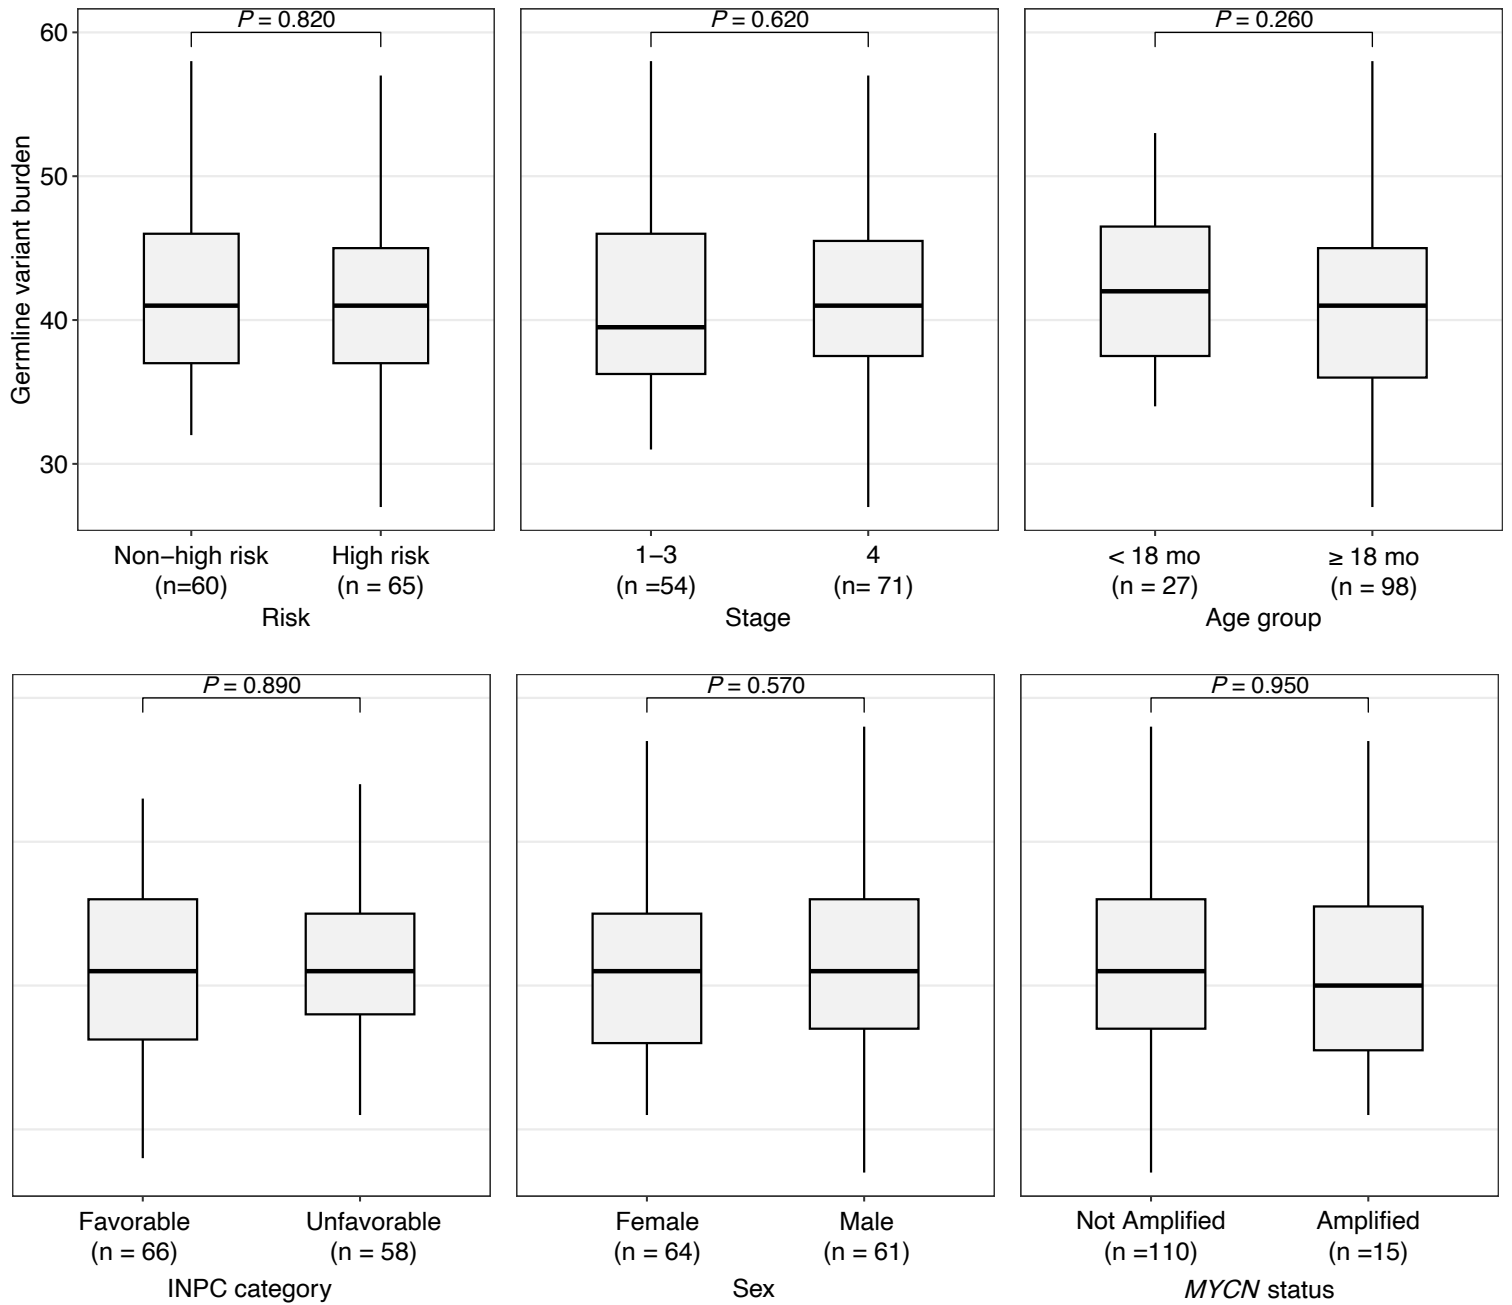

**Supplementary Fig. 3 Box plot comparison of germline variant burden based on clinical risk factors.**

Each box plot displays the median value as the center line, the upper and lower box boundaries at the first and third quartiles (25th and 75th percentiles). All *P* values are derived from two-sided test. Source data are provided as a Source Data file.

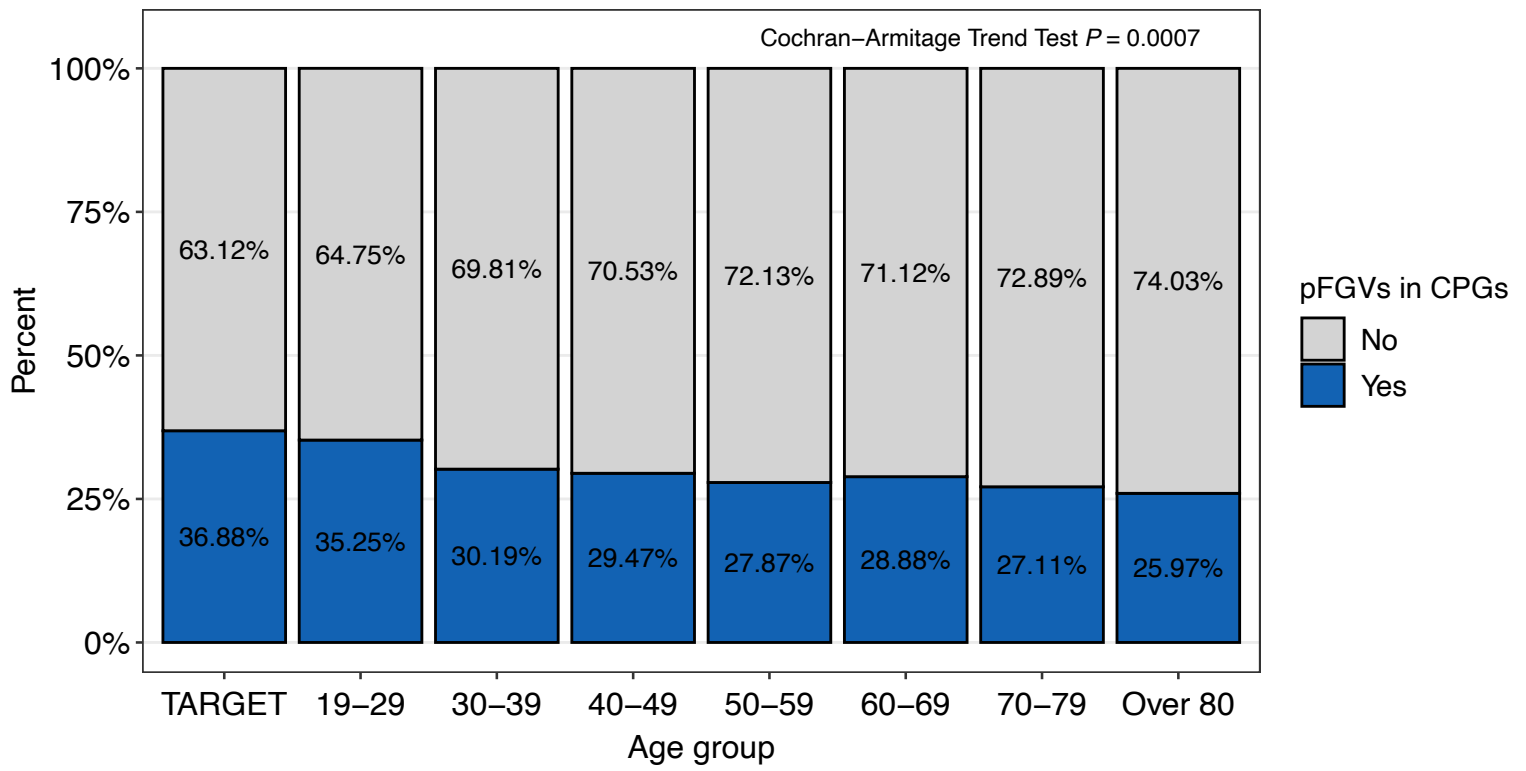

**Supplementary Fig. 4 Prevalence trends of pFGVs in CPGs across age groups in the TARGET and TCGA cohort.**

Source data are provided as a Source Data file.

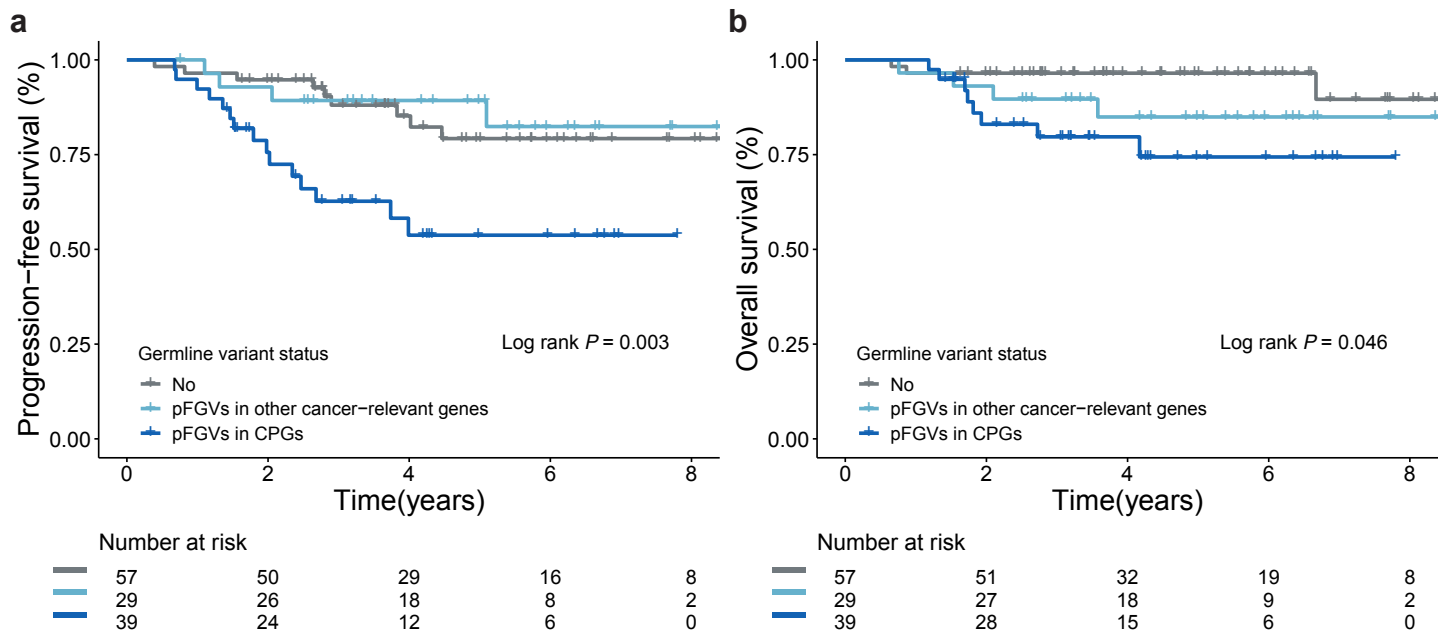

**Supplementary Fig. 5 Kaplan-Meier survival curves of pFGVs in CPGs and other cancer-relevant genes in the SMC cohort.**

**a**, PFS, **b**, OS. All  $P$  values are two-sided without correction for multiple comparisons. Source data are provided as a Source Data file.

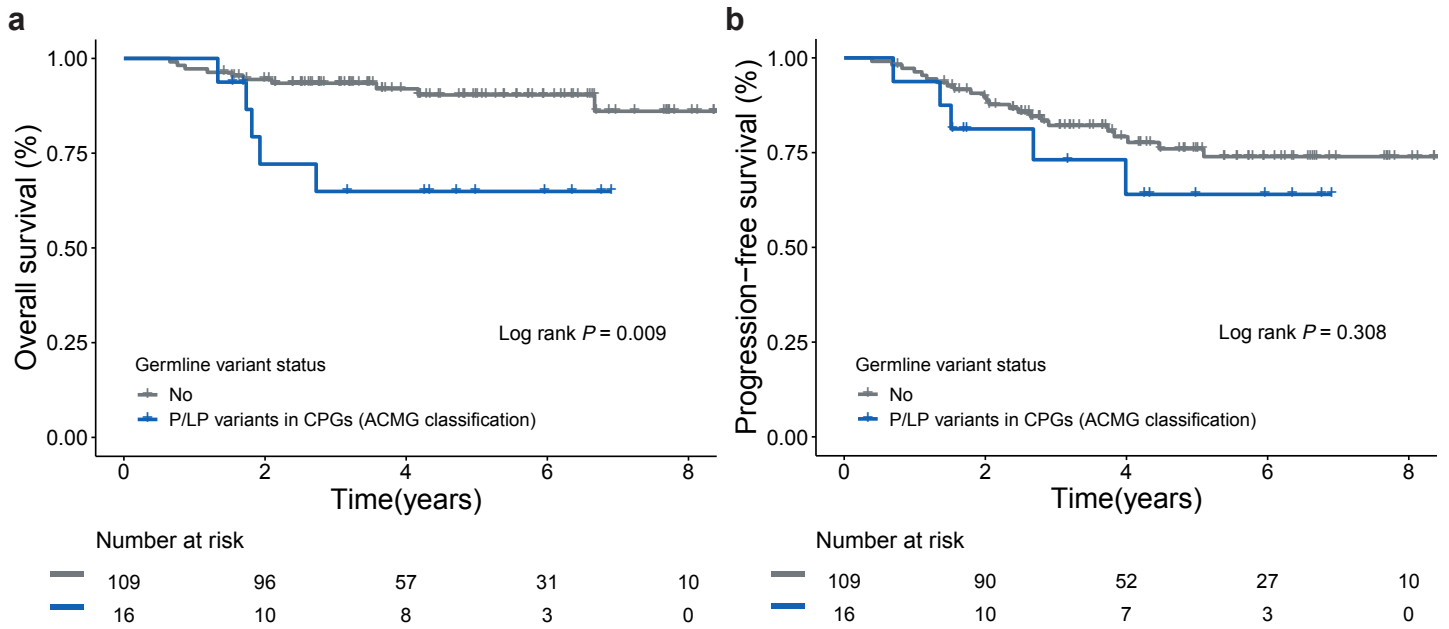

**Supplementary Fig. 6 Kaplan-Meier survival curves of P/LP variants presence in CPGs in the SMC cohort.**

**a**, OS. **b**, PFS. All  $P$  values are two-sided without correction for multiple comparisons. Source data are provided as a Source Data file.

| Variable                       |                            | N   | Hazard ratio        | P value |
|--------------------------------|----------------------------|-----|---------------------|---------|
| <b>Age</b>                     | < 18 mo                    | 27  | Reference           |         |
|                                | ≥ 18 mo                    | 98  | 2.01 (0.61, 6.67)   | 0.254   |
| <b>Stage</b>                   | 1'3                        | 54  | Reference           |         |
|                                | 4                          | 71  | 11.25 (2.67, 47.43) | < 0.001 |
| <b>MYCN status</b>             | Not amplified              | 110 | Reference           |         |
|                                | Amplified                  | 15  | 3.72 (1.58, 8.78)   | 0.003   |
| <b>Risk</b>                    | Non <sup>1</sup> high risk | 60  | Reference           |         |
|                                | High risk                  | 65  | 13.93 (3.30, 58.71) | < 0.001 |
| <b>Germline variant burden</b> | Low                        | 59  | Reference           |         |
|                                | High                       | 66  | 2.60 (1.14, 5.91)   | 0.023   |
| <b>pFGVs in CPGs</b>           | No                         | 86  | Reference           |         |
|                                | Yes                        | 39  | 3.44 (1.63, 7.27)   | 0.001   |

1 2 5 10 30

**Supplementary Fig. 7 Univariable Cox regression analysis for PFS in the SMC cohort.**

All *P* values are two-sided without correction for multiple comparisons. Source data are provided as a Source Data file.



**a**

Target samples with reference populations (#SNPs=3124)

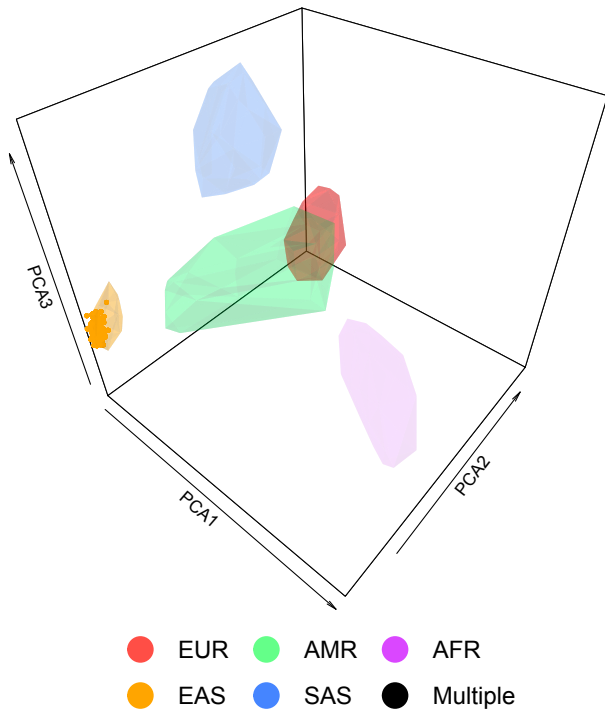**b**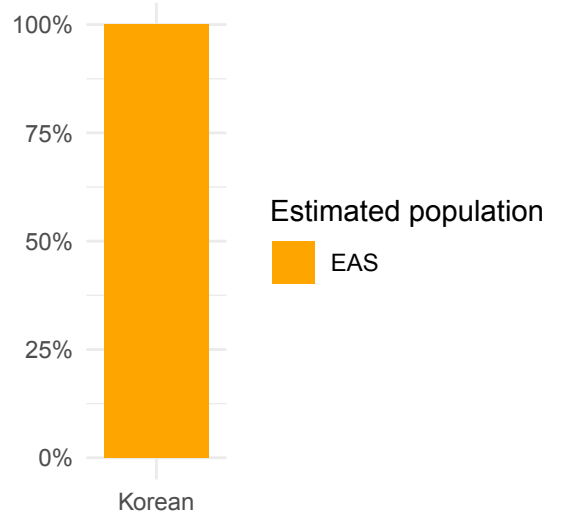**c**

Target samples with reference populations (#SNPs=6998)

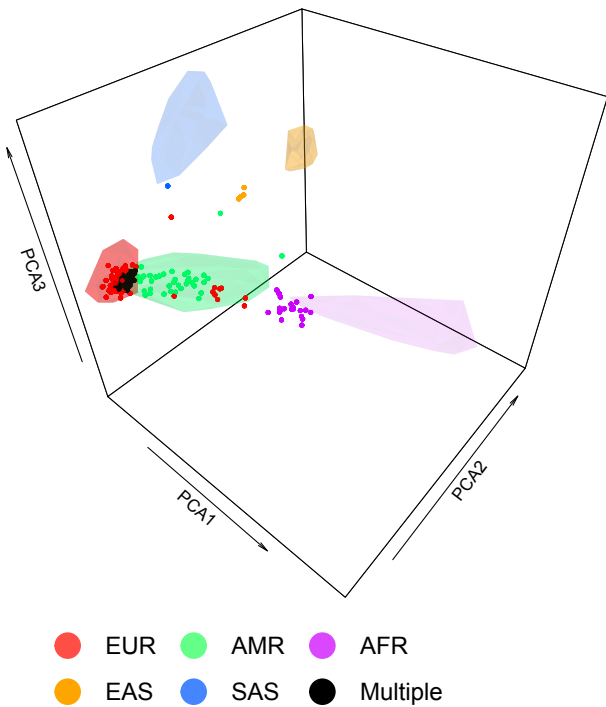**d**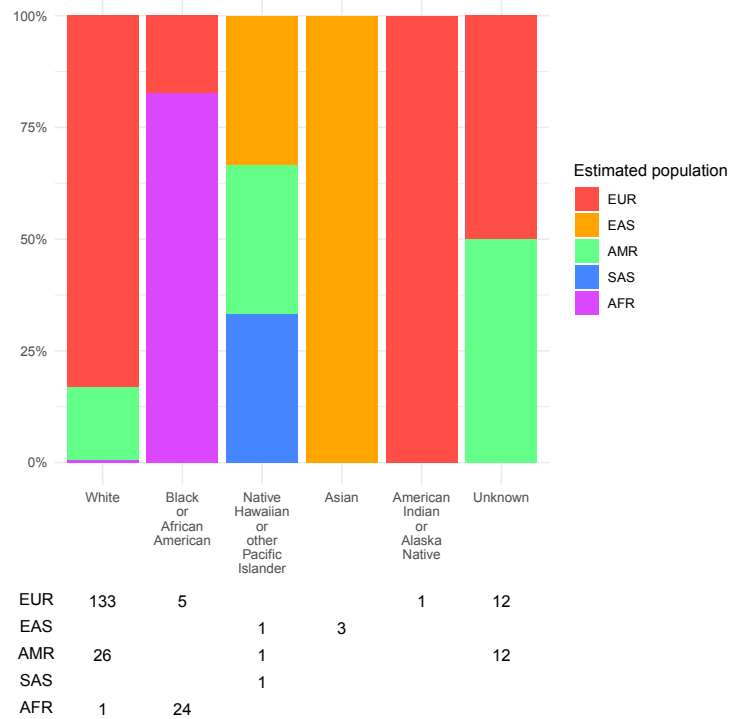

### Supplementary Fig. 8 Ancestry analysis using genotype principal components analysis (PCA)-based approach.

**a**, Three-dimensional representation of the first three PCs for the SMC cohort. **b**, Bar plot of estimated population proportions by ancestry analysis according to reported ethnicity in the SMC cohort. **c**, Three-dimensional representation of the first three PCs. **d**, Bar plot of estimated population proportions by ancestry analysis according to reported ethnicity in the TARGET cohort. Individuals who were annotated with multiple ancestry was categorized by the most contributory ethnicity. Source data are provided as a Source Data file.

## Supplementary Table 1. Patient and Disease Characteristics

| Characteristic                              | N = 125   |
|---------------------------------------------|-----------|
| <b>Age at diagnosis</b>                     |           |
| < 18 months                                 | 27 (22%)  |
| ≥ 18 months                                 | 98 (78%)  |
| <b>Sex</b>                                  |           |
| Female                                      | 64 (51%)  |
| Male                                        | 61 (49%)  |
| <b>INSS stage</b>                           |           |
| 1                                           | 13 (10%)  |
| 2                                           | 30 (24%)  |
| 3                                           | 11 (8.8%) |
| 4                                           | 71 (57%)  |
| <b>Histology</b>                            |           |
| Favorable                                   | 66 (53%)  |
| Unfavorable                                 | 58 (47%)  |
| <b>Family history of cancer<sup>a</sup></b> |           |
| No                                          | 28 (38%)  |
| Yes                                         | 45 (62%)  |
| <b>Primary site</b>                         |           |
| Abdomen                                     | 88 (70%)  |
| Mediastinum                                 | 37 (30%)  |
| <b>MYCN status</b>                          |           |
| Not amplified                               | 110 (88%) |
| Amplified                                   | 15 (12%)  |
| <b>Risk<sup>b</sup></b>                     |           |
| Low                                         | 40 (32%)  |
| Intermediate                                | 20 (16%)  |
| High                                        | 65 (52%)  |

<sup>a</sup>Family history of cancer were defined as presence of any cancer in at least one first or second-degree relative. <sup>b</sup>Stage 1, 2, and 4S tumors according to the INSS were stratified into the low-risk group if *MYCN* was not amplified, and stage 4 tumors in patients ≥ 18 months of age or any tumors with amplified *MYCN* were classified as the high-risk group.

Abbreviations: INSS, International Neuroblastoma Staging System

**Supplementary Table 2.**  
**Baseline Characteristics According to the Presence of pFGVs**  
**in CPGs**

| <b>Characteristics</b>                      | <b>N</b> | <b>No, N = 86<sup>1</sup></b> | <b>Yes, N = 39<sup>1</sup></b> | <b>Pvalue</b> |
|---------------------------------------------|----------|-------------------------------|--------------------------------|---------------|
| <b>Age</b>                                  | 125      |                               |                                | 0.842         |
| < 18 months                                 |          | 19 / 86 (22%)                 | 8 / 39 (21%)                   |               |
| ≥ 18 months                                 |          | 67 / 86 (78%)                 | 31 / 39 (79%)                  |               |
| <b>Sex</b>                                  | 125      |                               |                                | 0.252         |
| Female                                      |          | 47 / 86 (55%)                 | 17 / 39 (44%)                  |               |
| Male                                        |          | 39 / 86 (45%)                 | 22 / 39 (56%)                  |               |
| <b>Family history of cancer<sup>a</sup></b> | 73       | 25 / 47 (53%)                 | 20 / 26 (77%)                  | 0.046         |
| <b>INSS Stage</b>                           | 125      |                               |                                | 0.467         |
| 1                                           |          | 11 / 86 (13%)                 | 2 / 39 (5.1%)                  |               |
| 2                                           |          | 21 / 86 (24%)                 | 9 / 39 (23%)                   |               |
| 3                                           |          | 6 / 86 (7.0%)                 | 5 / 39 (13%)                   |               |
| 4                                           |          | 48 / 86 (56%)                 | 23 / 39 (59%)                  |               |
| <b>Histology</b>                            | 124      |                               |                                | 0.762         |
| Favorable                                   |          | 45 / 86 (52%)                 | 21 / 38 (55%)                  |               |
| Unfavorable                                 |          | 41 / 86 (48%)                 | 17 / 38 (45%)                  |               |
| <b>Primary site</b>                         | 125      |                               |                                | 0.282         |
| Abdomen                                     |          | 58 / 86 (67%)                 | 30 / 39 (77%)                  |               |
| Mediastinum                                 |          | 28 / 86 (33%)                 | 9 / 39 (23%)                   |               |
| <b>MYCN Status</b>                          | 125      |                               |                                | >0.99<br>9    |
| Not amplified                               |          | 76 / 86 (88%)                 | 34 / 39 (87%)                  |               |
| Amplified                                   |          | 10 / 86 (12%)                 | 5 / 39 (13%)                   |               |
| <b>Risk</b>                                 | 125      |                               |                                | 0.478         |
| Low                                         |          | 30 / 86 (35%)                 | 10 / 39 (26%)                  |               |
| Intermediate                                |          | 12 / 86 (14%)                 | 8 / 39 (21%)                   |               |
| High                                        |          | 44 / 86 (51%)                 | 21 / 39 (54%)                  |               |
| <b>Progression</b>                          | 125      |                               |                                | 0.004         |
| No                                          |          | 73 / 86 (85%)                 | 24 / 39 (62%)                  |               |
| Yes                                         |          | 13 / 86 (15%)                 | 15 / 39 (38%)                  |               |
| <b>Death</b>                                | 125      |                               |                                | 0.072         |
| No                                          |          | 79 / 86 (92%)                 | 31 / 39 (79%)                  |               |
| Yes                                         |          | 7 / 86 (8.1%)                 | 8 / 39 (21%)                   |               |

|                                  |     |       |       |       |
|----------------------------------|-----|-------|-------|-------|
| <b>Somatic mutational burden</b> | 125 | 25.01 | 20.92 | 0.654 |
| <b>Germline variant burden</b>   | 125 | 41.14 | 42.56 | 0.137 |

<sup>1</sup>n / N (%)

<sup>a</sup>Family history of cancer were defined as presence of any cancer in at least one first or second-degree relative.

All *P* values are derived from two-sided test without correction for multiple comparisons. Abbreviations: pFGV, putatively functional germline variant; CPG, cancer predisposition gene; INSS, International Neuroblastoma Staging System
