# Supplementary material for: Germline functional variants contribute to somatic mutation and outcomes in neuroblastoma
Source: PubMed Central journal article supplement — Nat Commun. 2024 Sep 27;15:8360. doi: 10.1038/s41467-024-52128-5 (PMC11437149; doi:10.1038/s41467-024-52128-5), 2024-09-27
Supplement: 41467_2024_52128_MOESM3_ESM.pdf [file 41467_2024_52128_MOESM3_ESM.pdf]

## **Description of Additional supplementary files**

**Supplementary Data 1:** List of Genes from the Cancer Gene Census in the Catalogue of Somatic Mutations in Cancer (COSMIC) Database.

**Supplementary Data 2:** Functional Germline Variants in Cancer Predisposition Genes in the SMC Cohort.

**Supplementary Data 3:** Functional Germline Variants in Cancer Predisposition Genes in the TARGET Cohort.

**Supplementary Data 4:** List of Eighty Core Genes Involved in DNA Damage Repair Gene
